# Supplementary material for: Mechanisms of alignment of lamellar-forming block copolymer under shear flow
Source: Royal Society of Chemistry journal article supplement (doi:10.1039/d4sm01241k), 2024-12-16
Supplement: d4sm01241k1.pdf [file d4sm01241k1.pdf]

## Supplementary information

Marco Pinna, Javier Diaz, Christopher Denison, Andrei Zvelindovsky,  
and Ignacio Pagonabarraga

December 2024

### 1 Supplementary Information: Minkowski functionals

The order/disorder of the system can be visualised using the Minkowski functional (MFs) as shown in Fig. 1 and can be used to determine the details of the BCP phase transition. The MFs provide useful information on the BCP geometry and topological structure: the volume, surface, mean curvature, and Euler characteristic  $\chi_E$ . The Euler characteristic  $\chi_E$  takes distinct values depending on the topology of the BCP morphology for instance,  $\chi_E = 1$  for a solid sphere,  $\chi_E = 0$  for a torus, and negative  $\chi_E$  values for a highly connected structure with holes (i.e., perforations, as in a perforated lamellar phase). Fig. 1 shows the 3 Minkowski functionals for the Euler characteristic ( $\chi_E$ ), Surface  $S$  and mean curvature. When the shear flow is above a threshold value we observe a drop in the Euler number and mean curvature while the surface is increasing. This behaviour describes the PM mechanism which is described in the MFs (see Fig. 1) by the diamond lines. A small  $\chi_E$  number means that the morphology of the di-BCPs goes through a lot of new interconnected domains (perforations) creating new interfaces and decreasing the total curvature. The behaviour of the  $\chi_E$  number decreases when the shear strength is increased while the surface area increases (see Fig. 1) respectively at time around  $W_i=10$  and  $W_i = 3$  for the  $\chi_E$  and surface area. A similar  $\chi_E$  number behaviour has been found in a previous study of BCPs under electric field using both CDS and the Dynamics Self Consistent Field Theory (DSCFT) computational techniques (see Fig. 4 in reference [1]). The rotation mechanisms represented by the squares (see Fig. 1) instead have higher  $\chi_E$  numbers (at time around  $W_i=10$ ) showing that there are less interconnected domains and hence the structure is more ordered during the time evolution.

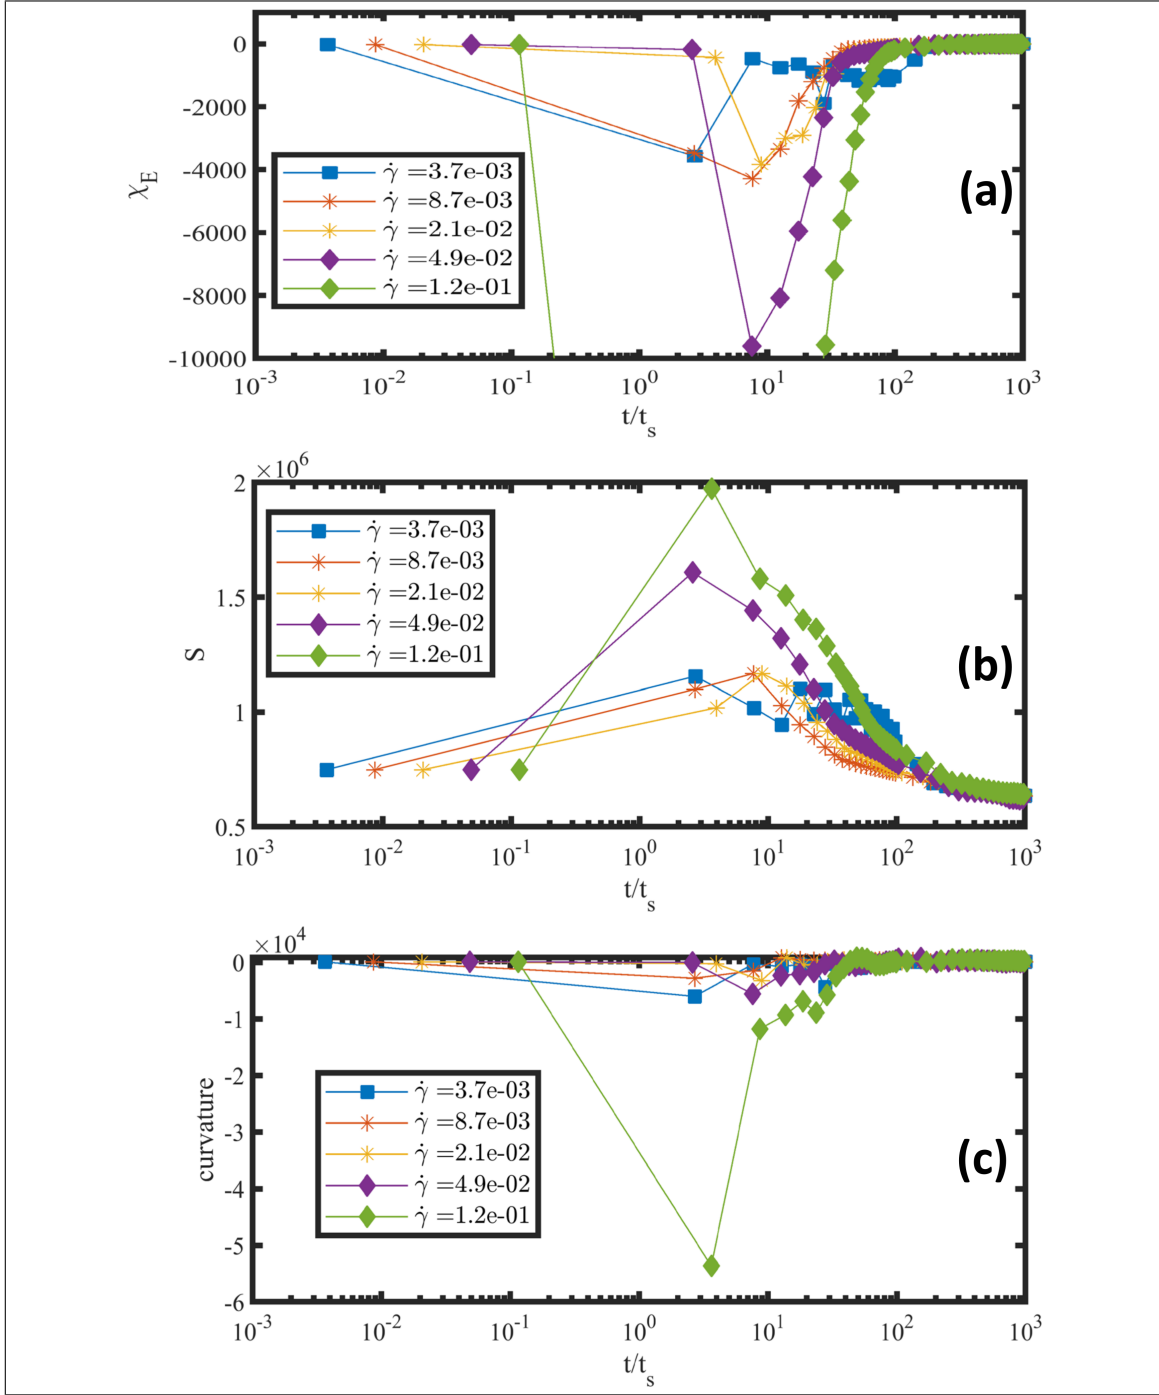

Figure 1: Time evolution of the Minkowski functionals for a lamella with  $L_z/H_0 = 1.0$  and  $\tau = 0.325$  for various values of  $\dot{\gamma}$  spanning various mechanism of alignment. The three Minkowski Functionals shown here are: (a) Euler characteristic, (b) surface and (c) mean curvature.

## References

- [1] GJA Sevink, M Pinna, KM Langner, and A V Zvelindovsky. Selective disordering of lamellae-forming diblock copolymers under an electric field. *Soft Matter*, 7:5161–5170, 2011.
